# Supplementary material
Source: PubMed Central journal article supplement (PMC3285497)
Supplement: NIHMS338672-supplement-Supp_Table_S1.pdf [file NIHMS338672-supplement-Supp_Table_S1.pdf]

## SUPPLEMENTARY MATERIAL

**Supplementary Table S1. Strains and plasmids used in this study.**

| <b>Strain</b>   | <b>Description</b>                                                                                                                                                          | <b>Reference or source</b>                                |
|-----------------|-----------------------------------------------------------------------------------------------------------------------------------------------------------------------------|-----------------------------------------------------------|
| CN3685          | type C strain isolated from peritoneal fluid of a sheep with struck                                                                                                         | (Sayeed <i>et al.</i> , 2008; Vidal <i>et al.</i> , 2008) |
| BMC100          | CN3685:: <i>cpb</i> null mutant                                                                                                                                             | (Sayeed <i>et al.</i> , 2008)                             |
| BMJV10          | CN3685:: <i>agrB</i> null mutant                                                                                                                                            | This study                                                |
| BMJV13          | CN3685:: <i>agrB</i> null mutant electroporated with p3 [a pJIR750 (Bannam and Rood, 1993) derivative plasmid encoding the <i>agr</i> operon (Vidal <i>et al.</i> , 2009a)] | This study                                                |
| CPJV19          | CN3685:: <i>luxS</i> null mutant                                                                                                                                            | (Vidal <i>et al.</i> , 2009b)                             |
|                 |                                                                                                                                                                             |                                                           |
| <b>Plasmids</b> |                                                                                                                                                                             |                                                           |
| pJIR750agri     | Intron vector with a <i>agrB</i> -targeted intron in the sense orientation                                                                                                  | (Li <i>et al.</i> , 2011)                                 |
| P3              | pJIR750 encoding the <i>agr</i> locus                                                                                                                                       | (Vidal <i>et al.</i> , 2009a)                             |
